# Supplementary material for: Fabrication, mechanical properties, and biocompatibility of reduced graphene oxide-reinforced nanofiber mats
Source: Royal Society of Chemistry journal article supplement (doi:10.1039/c4ra03987d), 2014-01-01
Supplement: c4ra03987d1.pdf [file c4ra03987d1.pdf]

Electronic Supplementary Information (ESI)

**Fabrication, mechanical properties, and biocompatibility of reduced graphene oxide-reinforced nanofiber mats**

Lin Jin,\*<sup>a</sup> Dan Yue,<sup>a</sup> Zhe-Wu Xu,<sup>b</sup> Guobin Liang,<sup>c</sup> Jian-Fu Zhang,<sup>a</sup> Xingcai Zhang,<sup>d</sup> and Zhenling Wang<sup>\*a</sup>

<sup>a</sup>The Key Laboratory of Rare Earth Functional Materials and Applications, Zhoukou Normal University, Zhoukou 466001, P. R. China

<sup>b</sup>Department of Oral and Maxillofacial Surgery, Guanghua School of Stomatology, Hospital of Stomatology, Guangdong Provincial Key Laboratory of Stomatology, Sun Yat-Sen University, Guangzhou 510055, P. R. China

<sup>c</sup>Department of Prosthodontics, Guanghua School of Stomatology, Hospital of Stomatology, Sun Yat-Sen University, Guangzhou 510055, P. R. China

<sup>d</sup>Institute for Micromanufacturing, Louisiana Tech University, 911 Hergot Ave., Ruston LA 71272, USA

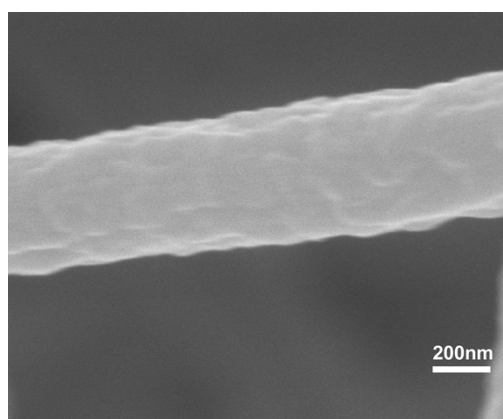

**Fig. S1** High magnification SEM image of nanofiber in rGO-NFMs.

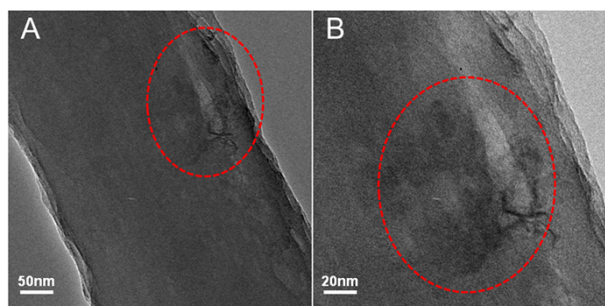

**Fig. S2** TEM images of nanofibers in rGO-NFMs.
